# Supplementary material
Source: MDPI journal article supplement (https://www.mdpi.com/2311-7524/8/4/310)
Supplement: s1 [file s1 › Figure S1 and Table S1.pdf]

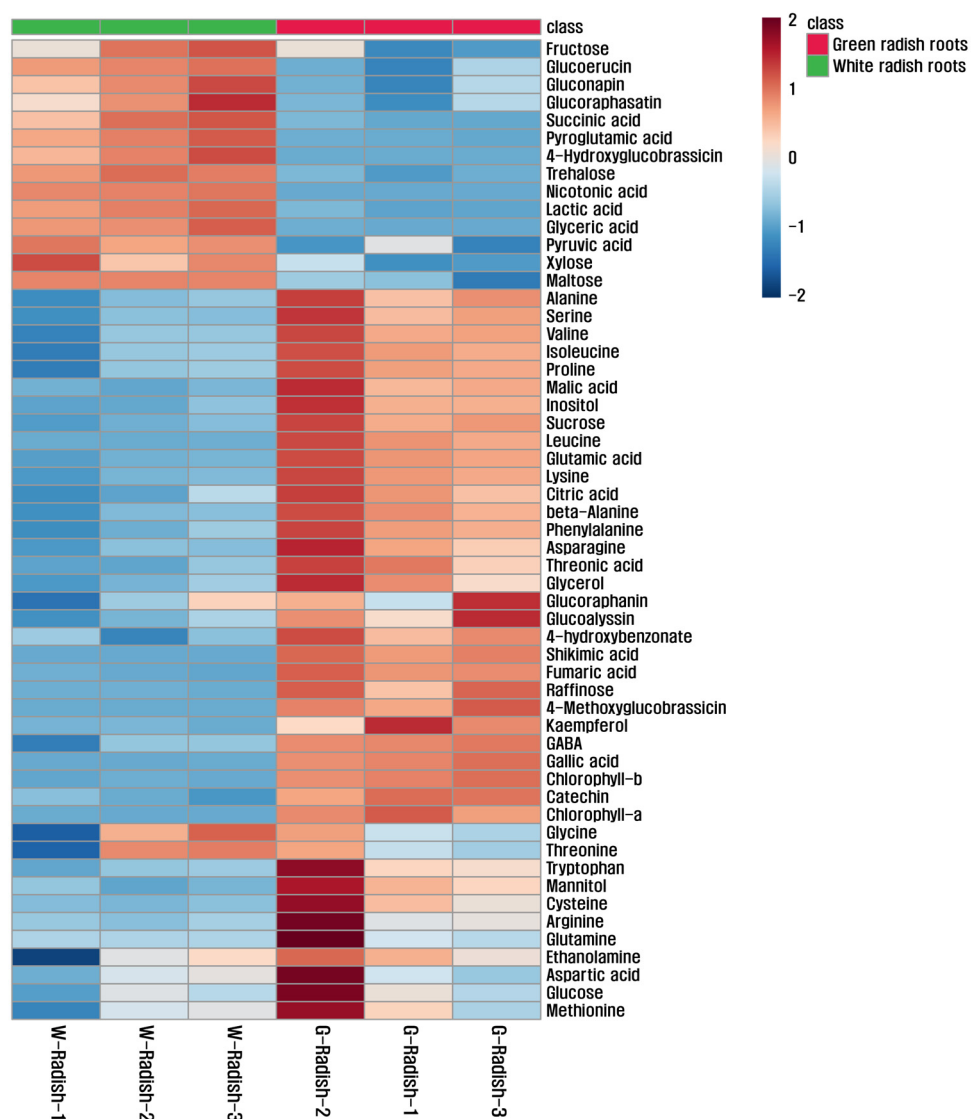

**Figure S1.** Heatmap representing changes in metabolite composition of green and white radish roots.

**Table S1.** Conditions for phytochemical analysis of metabolites detected in this study.

| Compounds               | Operating system                                                                                                                                                                                                                                                                                                                               | Operating conditions                                                                                                                                                                        | Program                                                                                                                                                                                                                                                                                                                           |
|-------------------------|------------------------------------------------------------------------------------------------------------------------------------------------------------------------------------------------------------------------------------------------------------------------------------------------------------------------------------------------|---------------------------------------------------------------------------------------------------------------------------------------------------------------------------------------------|-----------------------------------------------------------------------------------------------------------------------------------------------------------------------------------------------------------------------------------------------------------------------------------------------------------------------------------|
| Desulfo-glucosinolates  | The system consisted of a reversed-phase Inertsil ODS-3 column (150 × 3.0 mm i.d., particle size 3 µm; GL Sciences, Tokyo, Japan) with an E type cartridge guard column (10 × 2.0 mm i.d., 5 µm), an Agilent Technologies 1200 Series HPLC system (Palo Alto, CA, USA)                                                                         | The HPLC operating conditions were set as follows: detection wavelength, 227 nm; oven temperature, 40 °C; the flow rate, 0.2 mL/min; the running time; 40 min; and injection volume, 10 µL. | The mobile phase consisted of ultrapure water (solvent A) and CH <sub>3</sub> CN (solvent B). The gradient programs were as follows: a linear step from 7% to 24% of solvent B for 18 min, 24% of solvent B for the next 14 min, followed by a rapid drop to 7% B at 32.1 min, and then isocratic conditions with 7% B for 8 min. |
| Phenolic acids          | The system comprised an OptimaPak C18 column (250 × 4.6 mm, 5 µm; RStech Co., Daejeon, Republic of Korea), an NS-4000 HPLC system, a NS-6000 auto-sampler (Futechs Co., Daejeon, Republic of Korea), a degasser, and a UV-Vis detector.                                                                                                        | The HPLC operating conditions were set as follows: detection wavelength, 280 nm; oven temperature, 30 °C; flow rate, 1 mL/min; and injection volume, 20 µL.                                 | The mobile phase consisted of a mixture of (A) MeOH/water/acetic acid (5:92.5:2.5, v/v/v) and (B) MeOH/ water/acetic acid (95:2.5:2.5, v/v/v). The initial mobile phase composition was 0% solvent B, followed by a linear gradient from 0% to 80% of solvent B in 48 min, then holding at 0% solvent B for an additional 10 min. |
| Hydrophilic metabolites | The system consisted of a CP-Sil 8 CB low bleed/MS fused-silica capillary column (5%phenyl/95% dimethylpolysiloxane, 60 m × 0.25 mm ID, 0.25 µm film thickness; Varian Inc., Palo Alto, CA, USA), an Agilent 7890A gas chromatograph (Agilent, Atlanta, GA, USA) combined with a Pegasus HT TOF mass spectrometer (LECO, St. Joseph, MI, USA). | The operating conditions were set as follows: injection port temperature, 230 °C; helium gas flow rate, 1.0 mL/min; and split ratio, 1:25.                                                  | The temperature program was set as follows: initial temperature of 80 °C, 2 min; an increase to 320 °C at 15 °C/min; 10 min heating at 320 °C; transfer line temperature, 250 °C; ion source temperature, 200 °C; scanned mass range, m/z 85–600; and detector voltage, 1700 V.                                                   |
