# Supplementary material
Source: MDPI journal article supplement (https://www.mdpi.com/2311-7524/8/4/310)
Supplement: s1 [file s1 › Table S2.xls]

## Sheet: Sheet1
Table S2: Metabolites identified in the Korean white- and green- colored radish roots using GC-TOFMS.
	Pyruvic acid	Lactic acid	Alanine	Valine	Ethanolamine	Glycerol	Leucine	Isoleucine	Proline	Nicotonic acid	Glycine	Succinic acid	Glyceric acid	Fumaric acid	Serine	Threonine	β-Alanine	Malic acid	Aspartic acid	Methionine	Pyroglutamic acid	4-Aminobutyric acid	Threonic acid	Cysteine	Arginine	Glutamic acid	Phenylalanine	Xylose	Asparagine	Glutamine	Shikimic acid	Citric acid	Fructose	Glucose	Mannitol	Lysine	Inositol	Tryptophane	Sucrose	Maltose	Trehalose	Raffinose
White-1	0.0377535	1.62955	0.0230298	0.744574	0.442639	0.789863	0	0.206921	3.13342	0.0389964	0.797821	14.4315	2.84686	0.628072	0.641008	0.475858	0.0525221	23.8783	0.445295	0.0155521	20.8471	4.54054	0.460303	0	0	0.0243621	0.0742373	0.0614599	0.0696624	0	0	1.67251	110.719	41.7105	8.75361	0.0314586	0.818029	0.00434473	23.6363	0	0.0583031	0.511502
White-2	0.035328	1.7278	1.30776	1.87475	0.682958	0.810385	0.0898251	0.496434	11.6297	0.0395116	1.038	17.4864	2.91949	0.602859	0.964736	0.605936	0.0603925	23.2796	0.528942	0.0201495	22.4983	7.07803	0.462894	0.0176865	0.0210184	0.129715	0.0885841	0.0528586	0.139492	0	0	1.76309	122.238	46.2639	8.30442	0.0584738	0.823289	0.00953748	25.5665	0.15271	0.0642812	0.538073
White-3	0.0363989	1.80821	1.59832	1.88423	0.720828	0.834425	0.094186	0.516403	12.5396	0.0409571	1.09473	18.2482	3.39279	0.577378	0.945992	0.609888	0.0616011	24.2057	0.544135	0.0206275	24.0256	7.09865	0.510653	0.0188137	0.0310424	0.144741	0.103457	0.0577069	0.133768	0	0	2.05255	124.66	44.7151	8.49729	0.0630359	0.856349	0.0107144	27.0724	0.152252	0.0619457	0.503724
Green-1	0.0291144	0.774036	4.76952	4.09287	0.768693	0.957389	0.549646	1.06778	28.6761	0	0.943743	7.30422	0.449595	1.53826	1.84426	0.544054	0.0940376	32.1991	0.520414	0.0220474	11.508	12.9455	0.745648	0.0316706	0.0546402	1.19189	0.167867	0.0371093	0.408375	0.0241649	0.167998	2.62353	95.511	46.8608	10.5279	0.22339	1.02793	0.0265012	41.9158	0.109126	0.0197803	2.09163
Green-2	0.020578	0.875576	7.41554	5.2453	0.836058	1.01236	0.680277	1.2668	35.3779	0	1.05117	8.0155	0.481692	1.74159	2.50554	0.596359	0.102825	37.855	0.770297	0.0281495	11.6719	12.8251	0.797874	0.0459068	0.161768	1.50266	0.195792	0.0457659	0.568502	0.232774	0.194643	2.89568	110.697	55.8918	12.1105	0.279633	1.14332	0.0542411	49.4301	0.11268	0.0257713	2.97167
Green-3	0.0190432	0.787107	5.89042	4.20696	0.700095	0.900725	0.505449	1.00997	27.5722	0	0.921775	7.29176	0.43828	1.57397	1.99973	0.529951	0.0883953	32.8855	0.475261	0.0188322	11.3824	13.2937	0.651033	0.0270687	0.0587812	1.11922	0.161178	0.037999	0.34344	0.00644938	0	2.45772	97.3283	44.5151	10.1076	0.209689	1.02888	0.0243978	43.5725	0.0913681	0.0237306	2.91865
